# Supplementary material for: Prognostic Role of Non-Identification of Sentinel Lymph Node in Cutaneous Melanoma Patients: An Observational Retrospective Study
Source: MDPI journal article supplement (doi:10.3390/cancers12113151), 2020-10-27
Supplement: s1 [file s1]

Supplementary Material

# Prognostic Role of Non-Identification of Sentinel Lymph Node in Cutaneous Melanoma Patients: An Observational Retrospective Study

Ruggero Moro, Cintia Arjona-Aguilera, Celia Requena, Virginia Pont-Sanjuan, Victor Traves, Esperanza Manrique-Silva and Eduardo Nagore

Table S1. Follow-up of patients per disease stage.

| Stage    | TBSE + H&P                                                                       | NBU                                                                                | CT total body                                                                   | MR of CNS                                     |
|----------|----------------------------------------------------------------------------------|------------------------------------------------------------------------------------|---------------------------------------------------------------------------------|-----------------------------------------------|
| 0        | 12 months interval                                                               | -                                                                                  | -                                                                               | -                                             |
| IA       | 6 months interval for 5 years, then annually                                     | -                                                                                  | -                                                                               | -                                             |
| IB       | 6 months interval for 5 years, then annually                                     | Annually, or depending on physical exploration                                     | -                                                                               | -                                             |
| IIA-B    | 6 months interval for 5 years, then annually                                     | 6 months interval for 3 years, then annually, or depending on physical exploration | -                                                                               | -                                             |
| IIC/IIIA | 6 months interval for 5 years, then annually                                     | 6 months interval for 5 years, or depending on physical exploration                | 6 months interval for 5 years                                                   | -                                             |
| IIIB-C   | 3 months interval for 2 years, then 6 months interval for 3 years, then annually | 6 months interval for 5 years or depending on physical exploration                 | 6 months interval for 5 years                                                   | Annually for 5 years                          |
| IV NED   | 3 months interval for 3 years, then 6 months interval for 2 years, then annually | Depending on physical exploration                                                  | 3 months interval for 1 year, then 6 months interval for 4 years, then annually | Annually and before surgery of CNS metastases |

TBSE = total body skin examination with dermoscopic evaluation of cutaneous lesions; H&P = history and physical exam with palpation of nodal basins; NBU = nodal basins ultrasound; TC = computed tomography; MR = magnetic resonance; CNS = central nervous system
